# Supplementary material
Source: HighWire-hosted journal article supplement (https://bmjopen.bmj.com/content/10/5/e034987)
Supplement: inline-supplementary-material-1 [file inline-supplementary-material-1.pdf]

## Supplementary Material: Table 1. Visit schedule

| Study Plan                                                      | Initial Contact (<12 weeks gestation) |             | M1                  | M2-M9                                                                                    | M10                                                        | At Birth | I1              | I2-I6                                                                                                                | I7                                           |
|-----------------------------------------------------------------|---------------------------------------|-------------|---------------------|------------------------------------------------------------------------------------------|------------------------------------------------------------|----------|-----------------|----------------------------------------------------------------------------------------------------------------------|----------------------------------------------|
|                                                                 | Screening                             | Recruitment |                     |                                                                                          |                                                            |          |                 |                                                                                                                      |                                              |
| Schedule                                                        |                                       |             | Antenatal Follow-up | Antenatal Follow-up (monthly until second trimester, fortnightly in the third trimester) | Antenatal Follow-up (weekly after 36 weeks until delivery) |          | Infant 7-14 day | Infant follow-up: At months-1 ( $\pm$ 1 wk), 2 ( $\pm$ 2 wks), 3 ( $\pm$ 2 wks), 4 ( $\pm$ 2 wks) & 6 ( $\pm$ 2 wks) | Infant follow-up Age 9 months $\pm$ 14 days; |
| First Screening Visit                                           | X                                     |             |                     |                                                                                          |                                                            |          |                 |                                                                                                                      |                                              |
| Maternal Inclusion/Exclusion criteria                           | X                                     | X           |                     |                                                                                          |                                                            |          |                 |                                                                                                                      |                                              |
| Informed consent of the participant                             |                                       | X           |                     |                                                                                          |                                                            |          |                 |                                                                                                                      |                                              |
| Questionnaire Administration                                    |                                       | X           |                     |                                                                                          |                                                            |          |                 |                                                                                                                      |                                              |
| Randomization                                                   |                                       | X           |                     |                                                                                          |                                                            |          |                 |                                                                                                                      |                                              |
| Supplementation                                                 |                                       | X           | X                   | X                                                                                        | X                                                          | X        | X               | X                                                                                                                    |                                              |
| Blood Sampling (1 <sup>st</sup> trimester)                      |                                       | X           |                     |                                                                                          |                                                            |          |                 |                                                                                                                      |                                              |
| Home Visit (if required)                                        |                                       |             | X                   | X                                                                                        | X                                                          | X        | X               | X                                                                                                                    | X                                            |
| Monitoring of the Compliance                                    |                                       |             | X                   | X                                                                                        | X                                                          | X        | X               | X                                                                                                                    | X                                            |
| Adverse events                                                  |                                       |             | X                   | X                                                                                        | X                                                          | X        | X               | X                                                                                                                    | X                                            |
| Blood Sampling (3 <sup>rd</sup> trimester, >26 weeks gestation) |                                       |             |                     | X                                                                                        |                                                            |          |                 |                                                                                                                      |                                              |
| Mother Food Frequency Questionnaire (>26 weeks gestation)       |                                       |             |                     | X                                                                                        |                                                            |          |                 |                                                                                                                      |                                              |
| Infant Anthropometry (Weight/length/Head Circumference)         |                                       |             |                     |                                                                                          |                                                            | X        | X               | X                                                                                                                    | X                                            |
| Monitoring for neonatal morbidity*                              |                                       |             |                     |                                                                                          |                                                            | X        | X               | X                                                                                                                    | X                                            |
| Application of Exit Criteria (specified earlier)                |                                       |             | X                   | X                                                                                        | X                                                          | X        | X               | X                                                                                                                    | X                                            |
| Metabolic Screening of infant                                   |                                       |             |                     |                                                                                          |                                                            |          | X               |                                                                                                                      |                                              |
| Infant morbidity                                                |                                       |             |                     |                                                                                          |                                                            |          | X               | X                                                                                                                    | X                                            |
| Infant blood sampling                                           |                                       |             |                     |                                                                                          |                                                            |          |                 |                                                                                                                      | X                                            |
| Complementary feeding 72 hr. Dietary Recall                     |                                       |             |                     |                                                                                          |                                                            |          |                 |                                                                                                                      | X                                            |
| DASII Scale                                                     |                                       |             |                     |                                                                                          |                                                            |          |                 |                                                                                                                      | X                                            |

|                |  |  |  |  |  |  |  |  |   |
|----------------|--|--|--|--|--|--|--|--|---|
| HOME Inventory |  |  |  |  |  |  |  |  | x |
|----------------|--|--|--|--|--|--|--|--|---|
